# Supplementary material for: PC2P: parameter-free network-based prediction of protein complexes
Source: PubMed Central journal article supplement (PMC8034538; doi:10.1093/bioinformatics/btaa1089), 2021-01-08

**Supplementary Table 1.** Shown are the properties, i.e. number of proteins and interactions, in the PPI networks used in our analysis. Y stands for yeast and H for human. We also show the number of proteins and complexes in each of the gold standards used in our analysis. Finally, we also show the number of nodes and edges in the intersection of the PPI networks and gold standards of yeast and human, respectively.

| <b>PPI networks</b>  |             |           |                |               |            |          |
|----------------------|-------------|-----------|----------------|---------------|------------|----------|
|                      | Collins (Y) | Gavin (Y) | KroganCore (Y) | KroganExt (Y) | STRING (H) | PIPS (H) |
| <b>#Proteins</b>     | 1,622       | 1,855     | 2,708          | 3,672         | 2,227      | 1,673    |
| <b>#Interactions</b> | 9,074       | 7,669     | 7,123          | 14,317        | 8,565      | 5,385    |
| <b>Diameter</b>      | 15          | 13        | 12             | 10            | 21         | 18       |

### Gold standards

|                       | SGD(Y) | CYC2008(Y) | Corum |
|-----------------------|--------|------------|-------|
| <b>#proteins</b>      | 1,279  | 1,627      | 4,479 |
| <b>#complexes</b>     | 323    | 408        | 4,274 |
| <b>#complexes ≥ 3</b> | 238    | 236        | 2,783 |

| <b>Intersection of PPI networks and gold standards</b> |            |          |               |              |
|--------------------------------------------------------|------------|----------|---------------|--------------|
| MIPS                                                   | Collins(Y) | Gavin(Y) | KroganCore(Y) | KroganExt(Y) |
| <b>#Proteins</b>                                       | 773        | 766      | 780           | 888          |
| <b>#interactions</b>                                   | 4,778      | 2,695    | 1,797         | 2,639        |
|                                                        |            |          |               |              |
| SGD                                                    | Collins(Y) | Gavin(Y) | KroganCore(Y) | KroganExt(Y) |
| <b>#Proteins</b>                                       | 830        | 776      | 944           | 1,057        |
| <b>#interactions</b>                                   | 2,955      | 2,639    | 2,554         | 3,688        |
|                                                        |            |          |               |              |
| CYC2008                                                | Collins(Y) | Gavin(Y) | KroganCore(Y) | KroganExt(Y) |
| <b>#Proteins</b>                                       | 1,116      | 1,047    | 1,149         | 1,263        |
| <b>#interactions</b>                                   | 6,392      | 4,031    | 3,169         | 4,714        |
|                                                        |            |          |               |              |
| Corum                                                  | STRING(H)  | PIPS(H)  |               |              |
| <b>#Proteins</b>                                       | 1,711      | 871      |               |              |
| <b>#interactions</b>                                   | 7,289      | 2,692    |               |              |

**Supplementary Table 2.** Shown is the modularity of the clustering obtained by applying each of the eight compared algorithms on the PPI networks from yeast and human, respectively. The algorithms are ordered based on the year of publication.

| Modularity-Yeast |         |      |                                           |        |      |                                           |            |      |                                           |           |      |                                           |
|------------------|---------|------|-------------------------------------------|--------|------|-------------------------------------------|------------|------|-------------------------------------------|-----------|------|-------------------------------------------|
| Method           | Collins | Rank | Deviation of second best compared to PC2P | Gavin  | Rank | Deviation of second best compared to PC2P | KroganCore | Rank | Deviation of second best compared to PC2P | KroganExt | Rank | Deviation of second best compared to PC2P |
| MCL              | 0.7450  | 1    | <b>Not Best<br/>2.2%</b>                  | 0.7115 | 2    | <b>1.12%</b>                              | 0.1461     | 8    | <b>27.63%</b>                             | 0.3157    | 2    | <b>11.48%</b>                             |
| MCODE            | 0.5817  | 5    |                                           | 0.5166 | 4    |                                           | 0.2522     | 5    |                                           | 0.1982    | 6    |                                           |
| CFinder          | 0.6116  | 4    |                                           | 0.5487 | 3    |                                           | 0.2953     | 3    |                                           | 0.1108    | 7    |                                           |
| AP               | 0.1350  | 8    |                                           | 0.2017 | 8    |                                           | 0.2314     | 6    |                                           | 0.1079    | 8    |                                           |
| CMC              | 0.3000  | 7    |                                           | 0.3065 | 7    |                                           | 0.2586     | 4    |                                           | 0.2040    | 4    |                                           |
| ClusterOne       | 0.5671  | 6    |                                           | 0.5003 | 5    |                                           | 0.2244     | 7    |                                           | 0.2005    | 5    |                                           |
| ProRank+         | 0.0341  | 10   |                                           | 0.0917 | 9    |                                           | 0.0338     | 9    |                                           | 0.0603    | 9    |                                           |
| Core&Peel        | 0.0346  | 9    |                                           | 0.0862 | 10   |                                           | 0.0102     | 10   |                                           | 0.0132    | 10   |                                           |
| IMHRC            | 0.6125  | 3    |                                           | 0.4652 | 6    |                                           | 0.3527     | 2    |                                           | 0.2107    | 3    |                                           |
| PC2P             | 0.7287  | 2    |                                           | 0.7196 | 1    |                                           | 0.4873     | 1    |                                           | 0.3566    | 1    |                                           |

| Modularity-Human |        |      |                                        |        |      |                                           |
|------------------|--------|------|----------------------------------------|--------|------|-------------------------------------------|
| Method           | STRING | Rank | Deviation of PC2P Compared to the Best | PIPS   | Rank | Deviation of second best compared to PC2P |
| MCL              | 0.7664 | 1    | <b>Not Best<br/>4.56%</b>              | 0.1413 | 7    | <b>21.63%</b>                             |
| MCODE            | 0.5024 | 6    |                                        | 0.1908 | 5    |                                           |
| CFinder          | 0.6893 | 3    |                                        | 0.3742 | 2    |                                           |
| AP               | 0.1798 | 7    |                                        | 0.1880 | 6    |                                           |
| CMC              | 0.0726 | 8    |                                        | 0.0442 | 8    |                                           |
| ClusterOne       | 0.5799 | 5    |                                        | 0.2074 | 4    |                                           |
| ProRank+         | 0.0287 | 9    |                                        | 0.0243 | 9    |                                           |
| Core&Peel        | 0.0233 | 10   |                                        | 0.0069 | 10   |                                           |
| IMHRC            | 0.6423 | 4    |                                        | 0.3142 | 3    |                                           |
| PC2P             | 0.7314 | 2    |                                        | 0.4774 | 1    |                                           |

**Supplementary Table 2.** Shown is the modularity of the clustering obtained by applying each of the eight compared algorithms on the PPI networks from yeast and human, respectively. The algorithms are ordered based on the year of publication.

| Overlapped Modularity-Yeast |         |      |                                           |        |      |                                           |            |      |                                           |           |      |                                           |
|-----------------------------|---------|------|-------------------------------------------|--------|------|-------------------------------------------|------------|------|-------------------------------------------|-----------|------|-------------------------------------------|
| Method                      | Collins | Rank | Deviation of second best compared to PC2P | Gavin  | Rank | Deviation of second best compared to PC2P | KroganCore | Rank | Deviation of second best compared to PC2P | KroganExt | Rank | Deviation of second best compared to PC2P |
| MCL                         | 0.6866  | 2    | 2.58%                                     | 0.2781 | 6    | Not Best<br>3.77%                         | 0.4969     | 1    | Not Best<br>44.16%                        | 0.0331    | 3    | Not Best<br>26.69%                        |
| MCODE                       | 0.5543  | 5    |                                           | 0.3211 | 5    |                                           | 0.2117     | 5    |                                           | -0.0624   | 7    |                                           |
| CFinder                     | 0.6783  | 3    |                                           | 0.3675 | 1    |                                           | 0.2307     | 4    |                                           | -0.0713   | 8    |                                           |
| AP                          | 0.5566  | 4    |                                           | 0.1804 | 8    |                                           | 0.2448     | 3    |                                           | 0.1145    | 1    |                                           |
| CMC                         | 0.5347  | 6    |                                           | 0.2240 | 7    |                                           | 0.1911     | 7    |                                           | -0.0588   | 6    |                                           |
| ClusterOne                  | 0.4990  | 8    |                                           | 0.3381 | 3    |                                           | 0.2775     | 2    |                                           | 0.0839    | 2    |                                           |
| ProRank+                    | 0.1347  | 9    |                                           | 0.1491 | 9    |                                           | 0.1090     | 9    |                                           | 0.0135    | 5    |                                           |
| Core&Peel                   | 0.1193  | 10   |                                           | 0.0655 | 10   |                                           | -0.0020    | 10   |                                           | -0.0811   | 9    |                                           |
| IMHRC                       | 0.5089  | 7    |                                           | 0.3313 | 4    |                                           | 0.1493     | 8    |                                           | 0.0149    | 4    |                                           |
| PC2P                        | 0.7048  | 1    |                                           | 0.3536 | 2    |                                           | 0.1933     | 6    |                                           | -0.0846   | 10   |                                           |

| Overlapped Modularity-Human |        |      |                                        |         |      |                                           |
|-----------------------------|--------|------|----------------------------------------|---------|------|-------------------------------------------|
| Method                      | STRING | Rank | Deviation of PC2P Compared to the Best | PIPS    | Rank | Deviation of second best compared to PC2P |
| MCL                         | 0.6845 | 1    | Not Best<br>3.58%                      | 0.7908  | 1    | Not Best<br>48.21%                        |
| MCODE                       | 0.4742 | 6    |                                        | 0.2735  | 5    |                                           |
| CFinder                     | 0.6050 | 3    |                                        | 0.4096  | 2    |                                           |
| AP                          | 0.5916 | 4    |                                        | 0.3687  | 3    |                                           |
| CMC                         | 0.2009 | 8    |                                        | -0.0115 | 10   |                                           |
| ClusterOne                  | 0.4603 | 7    |                                        | 0.1809  | 7    |                                           |
| ProRank+                    | 0.1301 | 9    |                                        | 0.1078  | 8    |                                           |
| Core&Peel                   | 0.0997 | 10   |                                        | 0.0208  | 9    |                                           |
| IMHRC                       | 0.4999 | 5    |                                        | 0.2338  | 6    |                                           |
| PC2P                        | 0.6600 | 2    |                                        | 0.3480  | 4    |                                           |

**Supplementary Table 3.** Comparative analysis of eight algorithms for prediction of protein complexes with respect to nine performance measures as well as a composite score that combines five of them. Shown is also the modularity of the resulting clusterings.

| Comparative analysis |            |            |       |       |       |       |       |       |       |       |           |           |          |            |            |            |                       |                                                           |            |                                |                                                                   |
|----------------------|------------|------------|-------|-------|-------|-------|-------|-------|-------|-------|-----------|-----------|----------|------------|------------|------------|-----------------------|-----------------------------------------------------------|------------|--------------------------------|-------------------------------------------------------------------|
| Yeast - CYC2008      |            |            |       |       |       |       |       |       |       |       |           |           |          |            |            |            |                       |                                                           |            |                                |                                                                   |
| Data-set             | Method     | # Clusters | MMR   | FRM   | SEP   | PPV   | SN    | ACC   | Prec  | Rec   | F-measure | CDAP_prec | CDAP_rec | CDAP_fmeas | CDAP_F_MMR | Modularity | Overlapped Modularity | Composite Score (CS)<br>MMR + FRM + SEP + ACC + F-measure | CS Ranking | Deviation of PC2P to Max in CS | Deviation of second best in CS compared to PC2P (if PC2P is best) |
| Collin               | MCL        | 193        | 0.558 | 0.840 | 0.743 | 0.648 | 0.950 | 0.785 | 0.912 | 0.693 | 0.787     | 0.870     | 0.573    | 0.691      | 1.250      | 0.799      | 0.776                 | 3.713                                                     | 1          | 3.05%                          | Not Best                                                          |
|                      | MCODE      | 93         | 0.255 | 0.389 | 0.528 | 0.665 | 0.633 | 0.649 | 0.892 | 0.331 | 0.483     | 0.849     | 0.270    | 0.409      | 0.665      | 0.623      | 0.669                 | 2.304                                                     | 6          |                                |                                                                   |
|                      | CFinder    | 89         | 0.247 | 0.389 | 0.493 | 0.532 | 0.775 | 0.642 | 0.888 | 0.314 | 0.464     | 0.843     | 0.256    | 0.393      | 0.640      | 0.749      | 0.770                 | 2.235                                                     | 8          |                                |                                                                   |
|                      | AP         | 413        | 0.511 | 0.785 | 0.416 | 0.506 | 0.717 | 0.603 | 0.392 | 0.645 | 0.488     | 0.356     | 0.502    | 0.416      | 0.928      | 0.270      | 0.618                 | 2.803                                                     | 4          |                                |                                                                   |
|                      | CMC        | 119        | 0.205 | 0.324 | 0.333 | 0.646 | 0.538 | 0.590 | 0.622 | 0.266 | 0.373     | 0.571     | 0.232    | 0.330      | 0.535      | 0.343      | 0.363                 | 1.825                                                     | 9          |                                |                                                                   |
|                      | ClusterOne | 127        | 0.338 | 0.597 | 0.553 | 0.611 | 0.833 | 0.714 | 0.898 | 0.488 | 0.632     | 0.819     | 0.355    | 0.495      | 0.833      | 0.705      | 0.636                 | 2.834                                                     | 3          |                                |                                                                   |
|                      | ProRank+   | 458        | 0.382 | 0.491 | 0.238 | 0.477 | 0.796 | 0.616 | 0.683 | 0.433 | 0.530     | 0.251     | 0.392    | 0.306      | 0.688      | 0.284      | 0.164                 | 2.258                                                     | 7          |                                |                                                                   |
|                      | Core&Peel  | 210        | 0.181 | 0.266 | 0.198 | 0.647 | 0.499 | 0.568 | 0.457 | 0.218 | 0.296     | 0.276     | 0.198    | 0.231      | 0.412      | 0.249      | 0.174                 | 1.509                                                     | 10         |                                |                                                                   |
|                      | IMHRC      | 118        | 0.322 | 0.584 | 0.549 | 0.605 | 0.851 | 0.718 | 0.907 | 0.437 | 0.590     | 0.839     | 0.338    | 0.482      | 0.804      | 0.731      | 0.671                 | 2.762                                                     | 5          |                                |                                                                   |
|                      | PC2P       | 251        | 0.568 | 0.863 | 0.671 | 0.679 | 0.899 | 0.781 | 0.717 | 0.713 | 0.715     | 0.665     | 0.570    | 0.614      | 1.182      | 0.760      | 0.761                 | 3.600                                                     | 2          |                                |                                                                   |
| Gavin                | MCL        | 128        | 0.312 | 0.570 | 0.568 | 0.509 | 0.914 | 0.682 | 0.797 | 0.433 | 0.561     | 0.695     | 0.306    | 0.425      | 0.736      | 0.856      | 0.624                 | 2.693                                                     | 2          | 0.00%                          | 12.00%                                                            |
|                      | MCODE      | 87         | 0.209 | 0.333 | 0.490 | 0.562 | 0.654 | 0.606 | 0.770 | 0.265 | 0.394     | 0.701     | 0.210    | 0.323      | 0.532      | 0.651      | 0.538                 | 2.033                                                     | 8          |                                |                                                                   |
|                      | CFinder    | 103        | 0.245 | 0.443 | 0.465 | 0.485 | 0.816 | 0.629 | 0.806 | 0.337 | 0.475     | 0.718     | 0.254    | 0.376      | 0.620      | 0.796      | 0.605                 | 2.258                                                     | 6          |                                |                                                                   |
|                      | AP         | 301        | 0.264 | 0.478 | 0.289 | 0.366 | 0.719 | 0.513 | 0.292 | 0.357 | 0.322     | 0.219     | 0.227    | 0.223      | 0.487      | 0.383      | 0.290                 | 1.866                                                     | 9          |                                |                                                                   |
|                      | CMC        | 138        | 0.239 | 0.399 | 0.394 | 0.649 | 0.568 | 0.607 | 0.717 | 0.337 | 0.458     | 0.522     | 0.247    | 0.336      | 0.575      | 0.429      | 0.334                 | 2.097                                                     | 7          |                                |                                                                   |
|                      | ClusterOne | 140        | 0.301 | 0.564 | 0.494 | 0.574 | 0.801 | 0.678 | 0.757 | 0.426 | 0.545     | 0.621     | 0.299    | 0.404      | 0.705      | 0.726      | 0.513                 | 2.582                                                     | 3          |                                |                                                                   |
|                      | ProRank+   | 395        | 0.363 | 0.553 | 0.265 | 0.523 | 0.808 | 0.650 | 0.770 | 0.457 | 0.574     | 0.273     | 0.371    | 0.315      | 0.678      | 0.429      | 0.173                 | 2.405                                                     | 5          |                                |                                                                   |
|                      | Core&Peel  | 176        | 0.179 | 0.282 | 0.248 | 0.682 | 0.484 | 0.575 | 0.631 | 0.230 | 0.337     | 0.330     | 0.199    | 0.248      | 0.427      | 0.332      | 0.173                 | 1.621                                                     | 10         |                                |                                                                   |
|                      | IMHRC      | 127        | 0.269 | 0.557 | 0.485 | 0.538 | 0.843 | 0.673 | 0.669 | 0.357 | 0.466     | 0.575     | 0.251    | 0.349      | 0.618      | 0.759      | 0.541                 | 2.450                                                     | 4          |                                |                                                                   |
|                      | PC2P       | 203        | 0.417 | 0.722 | 0.578 | 0.622 | 0.841 | 0.723 | 0.685 | 0.567 | 0.620     | 0.571     | 0.399    | 0.470      | 0.887      | 0.791      | 0.541                 | 3.060                                                     | 1          |                                |                                                                   |
| KroganCore           | MCL        | 176        | 0.371 | 0.569 | 0.585 | 0.531 | 0.882 | 0.685 | 0.795 | 0.454 | 0.578     | 0.744     | 0.379    | 0.502      | 0.873      | 0.714      | 0.480                 | 2.789                                                     | 2          | 0.00%                          | 17.91%                                                            |
|                      | MCODE      | 65         | 0.117 | 0.191 | 0.366 | 0.581 | 0.367 | 0.462 | 0.677 | 0.136 | 0.226     | 0.569     | 0.107    | 0.180      | 0.297      | 0.388      | 0.376                 | 1.362                                                     | 8          |                                |                                                                   |
|                      | CFinder    | 87         | 0.176 | 0.289 | 0.388 | 0.494 | 0.643 | 0.564 | 0.828 | 0.228 | 0.358     | 0.759     | 0.191    | 0.305      | 0.481      | 0.623      | 0.462                 | 1.774                                                     | 7          |                                |                                                                   |
|                      | AP         | 244        | 0.279 | 0.462 | 0.351 | 0.345 | 0.711 | 0.495 | 0.451 | 0.350 | 0.394     | 0.328     | 0.231    | 0.271      | 0.550      | 0.417      | 0.341                 | 1.982                                                     | 5          |                                |                                                                   |
|                      | CMC        | 102        | 0.121 | 0.211 | 0.267 | 0.659 | 0.312 | 0.454 | 0.549 | 0.150 | 0.236     | 0.412     | 0.121    | 0.188      | 0.308      | 0.240      | 0.107                 | 1.289                                                     | 9          |                                |                                                                   |
|                      | ClusterOne | 189        | 0.315 | 0.540 | 0.470 | 0.619 | 0.748 | 0.680 | 0.762 | 0.425 | 0.546     | 0.556     | 0.303    | 0.393      | 0.708      | 0.594      | 0.321                 | 2.551                                                     | 3          |                                |                                                                   |
|                      | ProRank+   | 340        | 0.246 | 0.350 | 0.206 | 0.512 | 0.661 | 0.582 | 0.741 | 0.301 | 0.428     | 0.262     | 0.257    | 0.259      | 0.505      | 0.271      | 0.136                 | 1.811                                                     | 6          |                                |                                                                   |
|                      | Core&Peel  | 144        | 0.085 | 0.150 | 0.143 | 0.652 | 0.252 | 0.405 | 0.472 | 0.101 | 0.167     | 0.201     | 0.084    | 0.118      | 0.204      | 0.176      | 0.070                 | 0.950                                                     | 10         |                                |                                                                   |
|                      | IMHRC      | 161        | 0.263 | 0.517 | 0.457 | 0.550 | 0.791 | 0.660 | 0.677 | 0.321 | 0.435     | 0.528     | 0.246    | 0.335      | 0.598      | 0.611      | 0.343                 | 2.332                                                     | 4          |                                |                                                                   |
|                      | PC2P       | 338        | 0.556 | 0.815 | 0.618 | 0.697 | 0.788 | 0.741 | 0.642 | 0.694 | 0.667     | 0.530     | 0.517    | 0.523      | 1.079      | 0.643      | 0.402                 | 3.397                                                     | 1          |                                |                                                                   |
| KroganExt            | MCL        | 236        | 0.362 | 0.590 | 0.555 | 0.582 | 0.774 | 0.671 | 0.674 | 0.466 | 0.551     | 0.568     | 0.359    | 0.440      | 0.802      | 0.517      | 0.138                 | 2.729                                                     | 2          | 0.00%                          | 12.54%                                                            |
|                      | MCODE      | 54         | 0.089 | 0.145 | 0.334 | 0.491 | 0.353 | 0.417 | 0.648 | 0.097 | 0.168     | 0.593     | 0.086    | 0.150      | 0.239      | 0.293      | 0.100                 | 1.152                                                     | 9          |                                |                                                                   |
|                      | CFinder    | 69         | 0.119 | 0.188 | 0.299 | 0.302 | 0.681 | 0.453 | 0.739 | 0.150 | 0.250     | 0.681     | 0.126    | 0.213      | 0.331      | 0.290      | 0.217                 | 1.308                                                     | 8          |                                |                                                                   |
|                      | AP         | 320        | 0.275 | 0.483 | 0.298 | 0.335 | 0.593 | 0.446 | 0.384 | 0.330 | 0.355     | 0.203     | 0.174    | 0.188      | 0.463      | 0.237      | 0.090                 | 1.856                                                     | 5          |                                |                                                                   |
|                      | CMC        | 125        | 0.135 | 0.231 | 0.280 | 0.616 | 0.351 | 0.465 | 0.624 | 0.182 | 0.282     | 0.440     | 0.147    | 0.221      | 0.355      | 0.194      | -0.013                | 1.393                                                     | 7          |                                |                                                                   |
|                      | ClusterOne | 144        | 0.222 | 0.378 | 0.419 | 0.610 | 0.591 | 0.600 | 0.792 | 0.311 | 0.447     | 0.646     | 0.249    | 0.360      | 0.582      | 0.380      | 0.193                 | 2.067                                                     | 3          |                                |                                                                   |
|                      | ProRank+   | 206        | 0.173 | 0.273 | 0.239 | 0.570 | 0.550 | 0.560 | 0.680 | 0.217 | 0.329     | 0.330     | 0.182    | 0.235      | 0.408      | 0.202      | 0.112                 | 1.574                                                     | 6          |                                |                                                                   |
|                      | Core&Peel  | 185        | 0.097 | 0.164 | 0.144 | 0.589 | 0.290 | 0.413 | 0.535 | 0.123 | 0.200     | 0.222     | 0.110    | 0.147      | 0.244      | 0.128      | 0.009                 | 1.018                                                     | 10         |                                |                                                                   |
|                      | IMHRC      | 192        | 0.229 | 0.491 | 0.365 | 0.472 | 0.802 | 0.615 | 0.490 | 0.239 | 0.321     | 0.359     | 0.185    | 0.244      | 0.473      | 0.471      | 0.137                 | 2.020                                                     | 4          |                                |                                                                   |
|                      | PC2P       | 422        | 0.504 | 0.775 | 0.560 | 0.670 | 0.717 | 0.693 | 0.536 | 0.651 | 0.588     | 0.384     | 0.434    | 0.408      | 0.912      | 0.482      | 0.073                 | 3.120                                                     | 1          |                                |                                                                   |

**Supplementary Table 3.** Comparative analysis of eight algorithms for prediction of protein complexes with respect to nine performance measures as well as a composite score that combines five of them. Shown is also the modularity of the resulting clusterings.

| Comparative analysis |            |            |       |       |       |       |       |       |       |       |           |           |          |            |            |            |                       |                                                           |            |                                |                                                                   |
|----------------------|------------|------------|-------|-------|-------|-------|-------|-------|-------|-------|-----------|-----------|----------|------------|------------|------------|-----------------------|-----------------------------------------------------------|------------|--------------------------------|-------------------------------------------------------------------|
| Yeast - SGD          |            |            |       |       |       |       |       |       |       |       |           |           |          |            |            |            |                       |                                                           |            |                                |                                                                   |
| Data-set             | Method     | # Clusters | MMR   | FRM   | SEP   | PPV   | SN    | ACC   | Prec  | Rec   | F-measure | CDAP_prec | CDAP_rec | CDAP_fmeas | CDAP_F_MMR | Modularity | Overlapped Modularity | Composite Score (CS)<br>MMR + FRM + SEP + ACC + F-measure | CS Ranking | Deviation of PC2P to Max in CS | Deviation of second best in CS compared to PC2P (if PC2P is best) |
| Collins              | MCL        | 156        | 0.508 | 0.791 | 0.671 | 0.566 | 0.863 | 0.699 | 0.859 | 0.643 | 0.735     | 0.821     | 0.514    | 0.632      | 1.140      | 0.891      | 0.804                 | 3.404                                                     | 2          | 0.00%                          | 0.16%                                                             |
|                      | MCODE      | 85         | 0.262 | 0.438 | 0.503 | 0.541 | 0.630 | 0.584 | 0.800 | 0.333 | 0.471     | 0.800     | 0.273    | 0.407      | 0.670      | 0.713      | 0.700                 | 2.258                                                     | 8          |                                |                                                                   |
|                      | CFinder    | 83         | 0.272 | 0.474 | 0.503 | 0.484 | 0.758 | 0.606 | 0.855 | 0.337 | 0.484     | 0.843     | 0.281    | 0.422      | 0.693      | 0.831      | 0.796                 | 2.339                                                     | 7          |                                |                                                                   |
|                      | AP         | 272        | 0.507 | 0.787 | 0.425 | 0.452 | 0.698 | 0.562 | 0.515 | 0.635 | 0.568     | 0.445     | 0.486    | 0.464      | 0.972      | 0.462      | 0.692                 | 2.850                                                     | 3          |                                |                                                                   |
|                      | CMC        | 74         | 0.203 | 0.349 | 0.370 | 0.525 | 0.534 | 0.529 | 0.851 | 0.285 | 0.427     | 0.757     | 0.225    | 0.347      | 0.549      | 0.521      | 0.557                 | 1.879                                                     | 9          |                                |                                                                   |
|                      | ClusterOne | 104        | 0.338 | 0.570 | 0.533 | 0.551 | 0.759 | 0.647 | 0.885 | 0.458 | 0.603     | 0.865     | 0.361    | 0.510      | 0.848      | 0.807      | 0.727                 | 2.692                                                     | 4          |                                |                                                                   |
|                      | ProRank+   | 314        | 0.407 | 0.562 | 0.275 | 0.446 | 0.761 | 0.583 | 0.803 | 0.462 | 0.586     | 0.322     | 0.406    | 0.359      | 0.765      | 0.474      | 0.226                 | 2.413                                                     | 6          |                                |                                                                   |
|                      | Core&Peel  | 106        | 0.181 | 0.305 | 0.243 | 0.496 | 0.502 | 0.499 | 0.736 | 0.241 | 0.363     | 0.472     | 0.201    | 0.282      | 0.463      | 0.405      | 0.319                 | 1.592                                                     | 10         |                                |                                                                   |
|                      | IMHRC      | 103        | 0.335 | 0.566 | 0.527 | 0.548 | 0.766 | 0.648 | 0.883 | 0.438 | 0.585     | 0.854     | 0.353    | 0.500      | 0.835      | 0.784      | 0.718                 | 2.661                                                     | 5          |                                |                                                                   |
|                      | PC2P       | 182        | 0.525 | 0.827 | 0.644 | 0.580 | 0.842 | 0.699 | 0.758 | 0.675 | 0.714     | 0.725     | 0.530    | 0.613      | 1.137      | 0.873      | 0.805                 | 3.409                                                     | 1          |                                |                                                                   |
|                      | Gavin      | MCL        | 97    | 0.291 | 0.510 | 0.537 | 0.430 | 0.895 | 0.621 | 0.825 | 0.382     | 0.523     | 0.753    | 0.291      | 0.420      | 0.711      | 0.827                 | 0.709                                                     | 2.481      |                                |                                                                   |
| MCODE                |            | 77         | 0.220 | 0.394 | 0.464 | 0.504 | 0.648 | 0.572 | 0.779 | 0.267 | 0.398     | 0.714     | 0.219    | 0.335      | 0.555      | 0.647      | 0.576                 | 2.047                                                     | 7          |                                |                                                                   |
| CFinder              |            | 83         | 0.244 | 0.470 | 0.462 | 0.437 | 0.808 | 0.594 | 0.795 | 0.303 | 0.439     | 0.771     | 0.255    | 0.383      | 0.627      | 0.793      | 0.668                 | 2.209                                                     | 6          |                                |                                                                   |
| AP                   |            | 226        | 0.277 | 0.498 | 0.297 | 0.349 | 0.636 | 0.471 | 0.332 | 0.339 | 0.335     | 0.261     | 0.235    | 0.247      | 0.524      | 0.450      | 0.334                 | 1.878                                                     | 9          |                                |                                                                   |
| CMC                  |            | 107        | 0.228 | 0.398 | 0.374 | 0.535 | 0.561 | 0.548 | 0.673 | 0.303 | 0.418     | 0.533     | 0.227    | 0.318      | 0.546      | 0.451      | 0.388                 | 1.966                                                     | 8          |                                |                                                                   |
| ClusterOne           |            | 109        | 0.293 | 0.598 | 0.492 | 0.511 | 0.809 | 0.643 | 0.780 | 0.406 | 0.534     | 0.716     | 0.311    | 0.433      | 0.726      | 0.778      | 0.589                 | 2.560                                                     | 2          |                                |                                                                   |
| ProRank+             |            | 290        | 0.352 | 0.554 | 0.273 | 0.455 | 0.797 | 0.602 | 0.759 | 0.406 | 0.529     | 0.310     | 0.359    | 0.333      | 0.685      | 0.480      | 0.211                 | 2.310                                                     | 5          |                                |                                                                   |
| Core&Peel            |            | 132        | 0.187 | 0.319 | 0.245 | 0.510 | 0.493 | 0.501 | 0.621 | 0.227 | 0.333     | 0.364     | 0.191    | 0.251      | 0.437      | 0.370      | 0.237                 | 1.585                                                     | 10         |                                |                                                                   |
| IMHRC                |            | 104        | 0.273 | 0.566 | 0.474 | 0.483 | 0.809 | 0.625 | 0.769 | 0.382 | 0.511     | 0.673     | 0.279    | 0.394      | 0.668      | 0.778      | 0.600                 | 2.449                                                     | 4          |                                |                                                                   |
| PC2P                 |            | 159        | 0.421 | 0.753 | 0.578 | 0.567 | 0.822 | 0.683 | 0.761 | 0.578 | 0.657     | 0.654     | 0.414    | 0.507      | 0.928      | 0.810      | 0.630                 | 3.091                                                     | 1          |                                |                                                                   |
| KroganCore           |            | MCL        | 140   | 0.374 | 0.565 | 0.546 | 0.460 | 0.804 | 0.608 | 0.800 | 0.471     | 0.593     | 0.736    | 0.373      | 0.495      | 0.869      | 0.785                 | 0.536                                                     | 2.686      | 2                              | 0.00%                                                             |
|                      | MCODE      | 54         | 0.126 | 0.239 | 0.367 | 0.466 | 0.387 | 0.425 | 0.685 | 0.156 | 0.254     | 0.611     | 0.120    | 0.200      | 0.326      | 0.425      | 0.417                 | 1.411                                                     | 8          |                                |                                                                   |
|                      | CFinder    | 73         | 0.193 | 0.333 | 0.399 | 0.422 | 0.632 | 0.516 | 0.877 | 0.257 | 0.398     | 0.795     | 0.210    | 0.332      | 0.526      | 0.635      | 0.493                 | 1.839                                                     | 7          |                                |                                                                   |
|                      | AP         | 208        | 0.315 | 0.507 | 0.330 | 0.290 | 0.704 | 0.452 | 0.433 | 0.359 | 0.392     | 0.370     | 0.279    | 0.318      | 0.633      | 0.437      | 0.342                 | 1.997                                                     | 5          |                                |                                                                   |
|                      | CMC        | 81         | 0.130 | 0.254 | 0.274 | 0.551 | 0.335 | 0.430 | 0.605 | 0.167 | 0.261     | 0.506     | 0.149    | 0.230      | 0.359      | 0.271      | 0.185                 | 1.348                                                     | 9          |                                |                                                                   |
|                      | ClusterOne | 137        | 0.324 | 0.507 | 0.475 | 0.516 | 0.703 | 0.602 | 0.796 | 0.428 | 0.556     | 0.664     | 0.330    | 0.441      | 0.765      | 0.622      | 0.374                 | 2.465                                                     | 3          |                                |                                                                   |
|                      | ProRank+   | 297        | 0.278 | 0.399 | 0.210 | 0.423 | 0.639 | 0.520 | 0.717 | 0.341 | 0.462     | 0.269     | 0.290    | 0.279      | 0.557      | 0.283      | 0.140                 | 1.867                                                     | 6          |                                |                                                                   |
|                      | Core&Peel  | 130        | 0.104 | 0.192 | 0.140 | 0.500 | 0.289 | 0.380 | 0.477 | 0.127 | 0.200     | 0.231     | 0.109    | 0.148      | 0.251      | 0.192      | 0.085                 | 1.016                                                     | 10         |                                |                                                                   |
|                      | IMHRC      | 122        | 0.282 | 0.518 | 0.456 | 0.500 | 0.734 | 0.606 | 0.754 | 0.355 | 0.483     | 0.623     | 0.275    | 0.382      | 0.664      | 0.687      | 0.390                 | 2.344                                                     | 4          |                                |                                                                   |
|                      | PC2P       | 256        | 0.516 | 0.793 | 0.564 | 0.583 | 0.738 | 0.656 | 0.637 | 0.681 | 0.658     | 0.543     | 0.504    | 0.523      | 1.039      | 0.698      | 0.469                 | 3.187                                                     | 1          |                                |                                                                   |
|                      | KroganExt  | MCL        | 71    | 0.170 | 0.243 | 0.357 | 0.189 | 0.906 | 0.414 | 0.704 | 0.189     | 0.298     | 0.662    | 0.159      | 0.256      | 0.426      | 0.194                 | 0.475                                                     | 1.483      | 6                              |                                                                   |
| MCODE                |            | 39         | 0.080 | 0.122 | 0.310 | 0.338 | 0.372 | 0.355 | 0.692 | 0.098 | 0.172     | 0.667     | 0.088    | 0.155      | 0.235      | 0.318      | 0.227                 | 1.038                                                     | 10         |                                |                                                                   |
| CFinder              |            | 57         | 0.127 | 0.209 | 0.303 | 0.253 | 0.639 | 0.402 | 0.789 | 0.162 | 0.269     | 0.684     | 0.132    | 0.221      | 0.348      | 0.276      | 0.271                 | 1.311                                                     | 8          |                                |                                                                   |
| AP                   |            | 235        | 0.239 | 0.422 | 0.279 | 0.299 | 0.543 | 0.403 | 0.340 | 0.287 | 0.312     | 0.221     | 0.176    | 0.196      | 0.435      | 0.286      | 0.109                 | 1.655                                                     | 4          |                                |                                                                   |
| CMC                  |            | 97         | 0.151 | 0.267 | 0.288 | 0.519 | 0.359 | 0.432 | 0.629 | 0.203 | 0.307     | 0.485     | 0.159    | 0.239      | 0.390      | 0.214      | 0.055                 | 1.445                                                     | 7          |                                |                                                                   |
| ClusterOne           |            | 116        | 0.250 | 0.392 | 0.433 | 0.529 | 0.569 | 0.549 | 0.862 | 0.328 | 0.475     | 0.724     | 0.284    | 0.408      | 0.658      | 0.402      | 0.264                 | 2.099                                                     | 2          |                                |                                                                   |
| ProRank+             |            | 185        | 0.207 | 0.318 | 0.249 | 0.453 | 0.530 | 0.490 | 0.692 | 0.257 | 0.375     | 0.351     | 0.220    | 0.270      | 0.477      | 0.212      | 0.124                 | 1.638                                                     | 5          |                                |                                                                   |
| Core&Peel            |            | 149        | 0.114 | 0.199 | 0.153 | 0.495 | 0.310 | 0.392 | 0.510 | 0.142 | 0.222     | 0.242     | 0.122    | 0.162      | 0.276      | 0.149      | 0.038                 | 1.080                                                     | 9          |                                |                                                                   |
| IMHRC                |            | 149        | 0.240 | 0.459 | 0.360 | 0.420 | 0.704 | 0.543 | 0.570 | 0.291 | 0.385     | 0.443     | 0.223    | 0.297      | 0.537      | 0.503      | 0.177                 | 1.988                                                     | 3          |                                |                                                                   |
| PC2P                 |            | 324        | 0.469 | 0.716 | 0.502 | 0.565 | 0.663 | 0.612 | 0.485 | 0.588 | 0.531     | 0.386     | 0.422    | 0.403      | 0.872      | 0.533      | 0.201                 | 2.830                                                     | 1          |                                |                                                                   |

**Supplementary Table 3.** Comparative analysis of eight algorithms for prediction of protein complexes with respect to nine performance measures as well as a composite score that combines five of them. Shown is also the modularity of the resulting clusterings.

| Comparative analysis |            |            |       |       |       |       |       |       |       |       |           |           |          |            |            |            |                       |                                                           |            |                                |                                                                   |
|----------------------|------------|------------|-------|-------|-------|-------|-------|-------|-------|-------|-----------|-----------|----------|------------|------------|------------|-----------------------|-----------------------------------------------------------|------------|--------------------------------|-------------------------------------------------------------------|
| Human - Corum        |            |            |       |       |       |       |       |       |       |       |           |           |          |            |            |            |                       |                                                           |            |                                |                                                                   |
| Data-set             | Method     | # Clusters | MMR   | FRM   | SEP   | PPV   | SN    | ACC   | Prec  | Rec   | F-measure | CDAP_prec | CDAP_rec | CDAP_fmeas | CDAP_F_MMR | Modularity | Overlapped Modularity | Composite Score (CS)<br>MMR + FRM + SEP + ACC + F-measure | CS Ranking | Deviation of PC2P to Max in CS | Deviation of second best in CS compared to PC2P (if PC2P is best) |
| STRING               | MCL        | 384        | 0.089 | 0.606 | 0.237 | 0.139 | 0.754 | 0.323 | 0.802 | 0.404 | 0.537     | 0.664     | 0.085    | 0.150      | 0.239      | 0.721      | 0.655                 | 1.792                                                     | 2          | 0.00%                          | 0.15%                                                             |
|                      | MCODE      | 114        | 0.026 | 0.198 | 0.156 | 0.145 | 0.378 | 0.234 | 0.763 | 0.119 | 0.206     | 0.728     | 0.028    | 0.053      | 0.079      | 0.523      | 0.495                 | 0.820                                                     | 8          |                                |                                                                   |
|                      | CFinder    | 119        | 0.030 | 0.263 | 0.159 | 0.125 | 0.569 | 0.266 | 0.866 | 0.146 | 0.249     | 0.807     | 0.032    | 0.061      | 0.091      | 0.693      | 0.621                 | 0.967                                                     | 7          |                                |                                                                   |
|                      | AP         | 501        | 0.078 | 0.512 | 0.160 | 0.098 | 0.738 | 0.268 | 0.537 | 0.342 | 0.418     | 0.419     | 0.070    | 0.119      | 0.197      | 0.316      | 0.558                 | 1.435                                                     | 3          |                                |                                                                   |
|                      | CMC        | 132        | 0.023 | 0.132 | 0.094 | 0.148 | 0.283 | 0.205 | 0.636 | 0.089 | 0.155     | 0.523     | 0.023    | 0.044      | 0.067      | 0.330      | 0.246                 | 0.608                                                     | 9          |                                |                                                                   |
|                      | ClusterOne | 243        | 0.053 | 0.419 | 0.183 | 0.128 | 0.652 | 0.289 | 0.794 | 0.234 | 0.362     | 0.646     | 0.052    | 0.096      | 0.149      | 0.651      | 0.491                 | 1.305                                                     | 4          |                                |                                                                   |
|                      | ProRank+   | 587        | 0.083 | 0.349 | 0.080 | 0.140 | 0.579 | 0.285 | 0.714 | 0.235 | 0.354     | 0.443     | 0.086    | 0.144      | 0.227      | 0.275      | 0.145                 | 1.151                                                     | 6          |                                |                                                                   |
|                      | Core&Peel  | 206        | 0.025 | 0.091 | 0.049 | 0.143 | 0.241 | 0.186 | 0.515 | 0.059 | 0.106     | 0.374     | 0.026    | 0.048      | 0.073      | 0.191      | 0.124                 | 0.458                                                     | 10         |                                |                                                                   |
|                      | IMHRC      | 213        | 0.047 | 0.398 | 0.188 | 0.127 | 0.732 | 0.304 | 0.756 | 0.196 | 0.311     | 0.648     | 0.046    | 0.085      | 0.133      | 0.679      | 0.517                 | 1.248                                                     | 5          |                                |                                                                   |
|                      | PC2P       | 462        | 0.094 | 0.616 | 0.227 | 0.141 | 0.755 | 0.326 | 0.723 | 0.421 | 0.532     | 0.546     | 0.084    | 0.145      | 0.239      | 0.721      | 0.651                 | 1.795                                                     | 1          |                                |                                                                   |
| Data-set             | Method     | # Clusters | MMR   | FRM   | SEP   | PPV   | SN    | ACC   | Prec  | Rec   | F-measure | CDAP_prec | CDAP_rec | CDAP_fmeas | CDAP_F_MMR | Modularity | Overlapped Modularity | Composite Score (CS)<br>MMR + FRM + SEP + ACC + F-measure | CS Ranking | Deviation of PC2P to Max in CS | Deviation of second best in CS compared to PC2P (if PC2P is best) |
| PIPS                 | MCL        | 73         | 0.018 | 0.119 | 0.127 | 0.043 | 0.906 | 0.196 | 0.740 | 0.099 | 0.174     | 0.452     | 0.014    | 0.027      | 0.044      | 0.298      | 0.593                 | 0.634                                                     | 4          | 0.00%                          | 24.35%                                                            |
|                      | MCODE      | 32         | 0.006 | 0.060 | 0.106 | 0.069 | 0.292 | 0.141 | 0.406 | 0.015 | 0.029     | 0.281     | 0.004    | 0.007      | 0.013      | 0.221      | 0.192                 | 0.341                                                     | 9          |                                |                                                                   |
|                      | CFinder    | 36         | 0.008 | 0.061 | 0.090 | 0.043 | 0.621 | 0.163 | 0.556 | 0.023 | 0.044     | 0.417     | 0.006    | 0.012      | 0.020      | 0.391      | 0.435                 | 0.366                                                     | 8          |                                |                                                                   |
|                      | AP         | 222        | 0.051 | 0.371 | 0.142 | 0.064 | 0.687 | 0.210 | 0.635 | 0.267 | 0.376     | 0.392     | 0.036    | 0.066      | 0.117      | 0.293      | 0.356                 | 1.150                                                     | 2          |                                |                                                                   |
|                      | CMC        | 68         | 0.009 | 0.103 | 0.077 | 0.057 | 0.359 | 0.143 | 0.338 | 0.065 | 0.108     | 0.235     | 0.007    | 0.013      | 0.022      | 0.132      | 0.024                 | 0.440                                                     | 7          |                                |                                                                   |
|                      | ClusterOne | 83         | 0.015 | 0.131 | 0.124 | 0.075 | 0.477 | 0.189 | 0.386 | 0.048 | 0.085     | 0.301     | 0.010    | 0.020      | 0.035      | 0.394      | 0.297                 | 0.544                                                     | 6          |                                |                                                                   |
|                      | ProRank+   | 212        | 0.030 | 0.234 | 0.059 | 0.054 | 0.569 | 0.176 | 0.396 | 0.096 | 0.154     | 0.250     | 0.022    | 0.040      | 0.070      | 0.128      | 0.113                 | 0.653                                                     | 3          |                                |                                                                   |
|                      | Core&Peel  | 123        | 0.010 | 0.063 | 0.046 | 0.058 | 0.300 | 0.132 | 0.203 | 0.026 | 0.047     | 0.138     | 0.007    | 0.013      | 0.023      | 0.088      | 0.031                 | 0.298                                                     | 10         |                                |                                                                   |
|                      | IMHRC      | 99         | 0.017 | 0.110 | 0.126 | 0.062 | 0.699 | 0.208 | 0.374 | 0.055 | 0.097     | 0.303     | 0.012    | 0.024      | 0.041      | 0.470      | 0.278                 | 0.557                                                     | 5          |                                |                                                                   |
|                      | PC2P       | 302        | 0.078 | 0.495 | 0.218 | 0.098 | 0.713 | 0.264 | 0.689 | 0.351 | 0.465     | 0.454     | 0.057    | 0.101      | 0.178      | 0.494      | 0.366                 | 1.520                                                     | 1          |                                |                                                                   |



Supplementary Table 4. Result of the post-hoc Tukey test between means of GO semantic similarity over the clusters for biological process (BP), molecular function (MF), and cellular compartment (CC). Results are shown for min and mean analyses for four data sets of yeast and two data sets of human.

| Yc | Mean        |                |          |          | Min         |          |                  |             |          |          |               |                  |
|----|-------------|----------------|----------|----------|-------------|----------|------------------|-------------|----------|----------|---------------|------------------|
|    | BP          |                | MF       |          | BP          |          | MF               |             |          |          |               |                  |
|    | diff        | p-val          | diff     | p-val    | diff        | p-val    | diff             | p-val       |          |          |               |                  |
| Yc | MCODE-MCL   | -0.00592       | 0.13319  | 0.00275  | 1.00000     | 0.02275  | 0.81707          | -0.04485    | 0.04413  | 0.04077  | 0.81824       |                  |
|    | Cfinder-MCL | 0.00873        | 0.99999  | -0.03550 | 0.61714     | 0.00001  | 1.00000          | -0.00772    | 1.00000  | -0.00914 | 0.99954       |                  |
|    | AP-MCL      | -0.10953       | 0.00000  | -0.10308 | 0.00000     | -0.06513 | 0.00000          | -0.13888    | 0.00000  | -0.00000 | AP < MCL      |                  |
|    | CMC-MCL     | 0.13170        | 0.99982  | -0.02572 | 0.99862     | 0.22292  | 0.99999          | 0.16286     | 0.99999  | 0.28181  | 0.99999       |                  |
|    | Hc          | ClusterOne-MCL | -0.02499 | 0.85199  | -0.05766    | 0.00270  | ClusterOne > MCL | -0.02568    | 0.17628  | -0.09266 | 0.01233       | ClusterOne < MCL |
|    |             | ProRank-MCL    | 0.03253  | 0.42805  | -0.02005    | 0.00018  | ProRank > MCL    | 0.00395     | 0.99999  | -0.14480 | 0.00000       | ClusterOne < MCL |
|    |             | CorePeel-MCL   | 0.12370  | 0.00000  | 0.00444     | 1.00000  | 0.00241          | 0.00000     | 0.13027  | 0.00000  | ProRank < MCL |                  |
|    |             | IMHRC-MCL      | -0.14858 | 0.00000  | IMHRC < MCL | -0.07455 | 0.00000          | IMHRC < MCL | -0.00190 | 0.00000  | IMHRC < MCL   |                  |
|    |             | PCFP-MCL       | -0.00821 | 0.99991  | -0.00074    | 0.81812  | -0.00074         | 1.00000     | -0.01894 | 0.99979  | -0.04246      | 0.00000          |





**Supplementary Table 5.** Empirical running time on the four PPI networks of yeast and the two PPI networks of human.

| <b>Yeast</b> | <b>Empirical time</b>                      |
|--------------|--------------------------------------------|
| Collins      | 0 hour, 8 minutes and 43 seconds           |
| Gavin        | 0 hours, 32 minutes and 0 seconds          |
| KroganCore   | 0 days, 4 hours, 31 minutes and 35 seconds |
| KroganExt    | 1 day, 13 hours, 20 minutes and 31 seconds |

| <b>Human</b> | <b>Empirical time</b>             |
|--------------|-----------------------------------|
| PIPS         | 0 hours, 18 minutes and 2 seconds |
| STRING       | 0 hours, 5 minutes and 18 seconds |

**Supplementary Table 6.** The average of enrichment score of predicted complexes with at least one enriched annotation over all clusters are compared for the nine approaches across all datasets.

| Yeast   |            |              |              |              |
|---------|------------|--------------|--------------|--------------|
|         | method     | BP           | MF           | CC           |
| Collins | MCL        | 0.818        | 0.376        | 0.545        |
|         | MCODE      | 0.937        | 0.559        | 0.649        |
|         | CFinder    | 0.956        | 0.500        | 0.667        |
|         | AP         | 0.817        | 0.396        | 0.536        |
|         | CMC        | <b>0.989</b> | 0.645        | <b>0.817</b> |
|         | ClusterOne | 0.961        | 0.552        | 0.670        |
|         | ProrankPlu | 0.965        | <b>0.771</b> | 0.785        |
|         | Core&Peel  | 0.977        | 0.761        | 0.651        |
|         | IMHRC      | 0.963        | 0.590        | 0.691        |
|         | PC2P       | 0.949        | 0.582        | 0.646        |

|       | method     | BP           | MF           | CC           |
|-------|------------|--------------|--------------|--------------|
| Gavin | MCL        | 0.907        | 0.398        | 0.610        |
|       | MCODE      | 0.918        | 0.566        | 0.713        |
|       | CFinder    | 0.924        | 0.533        | 0.734        |
|       | AP         | 0.911        | 0.572        | 0.678        |
|       | CMC        | 0.957        | 0.558        | 0.726        |
|       | ClusterOne | 0.969        | 0.558        | 0.713        |
|       | ProrankPlu | 0.956        | <b>0.716</b> | <b>0.781</b> |
|       | Core&Peel  | 0.971        | 0.681        | 0.741        |
|       | IMHRC      | <b>0.973</b> | 0.579        | 0.699        |
|       | PC2P       | 0.959        | 0.594        | 0.771        |

|            | method     | BP           | MF           | CC           |
|------------|------------|--------------|--------------|--------------|
| KroganCore | MCL        | 0.768        | 0.354        | 0.405        |
|            | MCODE      | 0.896        | 0.519        | 0.597        |
|            | CFinder    | 0.930        | 0.487        | 0.617        |
|            | AP         | 0.846        | 0.542        | 0.594        |
|            | CMC        | <b>0.975</b> | 0.679        | <b>0.778</b> |
|            | ClusterOne | 0.885        | 0.424        | 0.576        |
|            | ProrankPlu | 0.927        | 0.628        | 0.701        |
|            | Core&Peel  | 0.880        | <b>0.696</b> | 0.749        |
|            | IMHRC      | 0.951        | 0.548        | 0.692        |
|            | PC2P       | 0.929        | 0.506        | 0.597        |

**Supplementary Table 6.** The average of enrichment score of predicted complexes with at least one enriched annotation over all clusters are compared for the nine approaches across all datasets.

|           | method     | BP    | MF    | CC    |
|-----------|------------|-------|-------|-------|
| KroganExt | MCL        | 0.810 | 0.441 | 0.499 |
|           | MCODE      | 0.894 | 0.723 | 0.660 |
|           | CFinder    | 0.901 | 0.405 | 0.570 |
|           | AP         | 0.879 | 0.637 | 0.621 |
|           | CMC        | 0.944 | 0.702 | 0.742 |
|           | ClusterOne | 0.867 | 0.471 | 0.550 |
|           | ProrankPlu | 0.897 | 0.551 | 0.627 |
|           | Core&Peel  | 0.918 | 0.709 | 0.775 |
|           | IMHRC      | 0.950 | 0.556 | 0.671 |
|           | PC2P       | 0.887 | 0.504 | 0.613 |

Human

|        | method     | BP    | MF    | CC    |
|--------|------------|-------|-------|-------|
| STRING | MCL        | 0.868 | 0.424 | 0.679 |
|        | MCODE      | 0.884 | 0.465 | 0.736 |
|        | CFinder    | 0.911 | 0.563 | 0.830 |
|        | AP         | 0.827 | 0.383 | 0.678 |
|        | CMC        | 0.919 | 0.466 | 0.758 |
|        | ClusterOne | 0.925 | 0.544 | 0.797 |
|        | ProrankPlu | 0.935 | 0.576 | 0.809 |
|        | Core&Peel  | 0.949 | 0.474 | 0.682 |
|        | IMHRC      | 0.917 | 0.547 | 0.811 |
|        | PC2P       | 0.922 | 0.498 | 0.812 |

|      | method     | BP    | MF    | CC    |
|------|------------|-------|-------|-------|
| PIPS | MCL        | 0.846 | 0.500 | 0.526 |
|      | MCODE      | 0.895 | 0.561 | 0.737 |
|      | CFinder    | 0.942 | 0.609 | 0.783 |
|      | AP         | 0.912 | 0.573 | 0.754 |
|      | CMC        | 1.000 | 0.661 | 0.831 |
|      | ClusterOne | 0.943 | 0.631 | 0.723 |
|      | ProrankPlu | 0.967 | 0.640 | 0.804 |
|      | Core&Peel  | 1.000 | 0.724 | 0.846 |
|      | IMHRC      | 0.967 | 0.687 | 0.810 |
|      | PC2P       | 0.925 | 0.653 | 0.755 |

**Supplementary Figure 1. Distribution of minimum and mean semantic similarities over clusters.** The distribution of minimum and mean semantic similarities are given for (A – B) Gavin, (C – D) KroganCore, (E – F) KroganExt, (G - H) PIPS, as well as the mean for (I-J) Collin and STRING PPI networks.

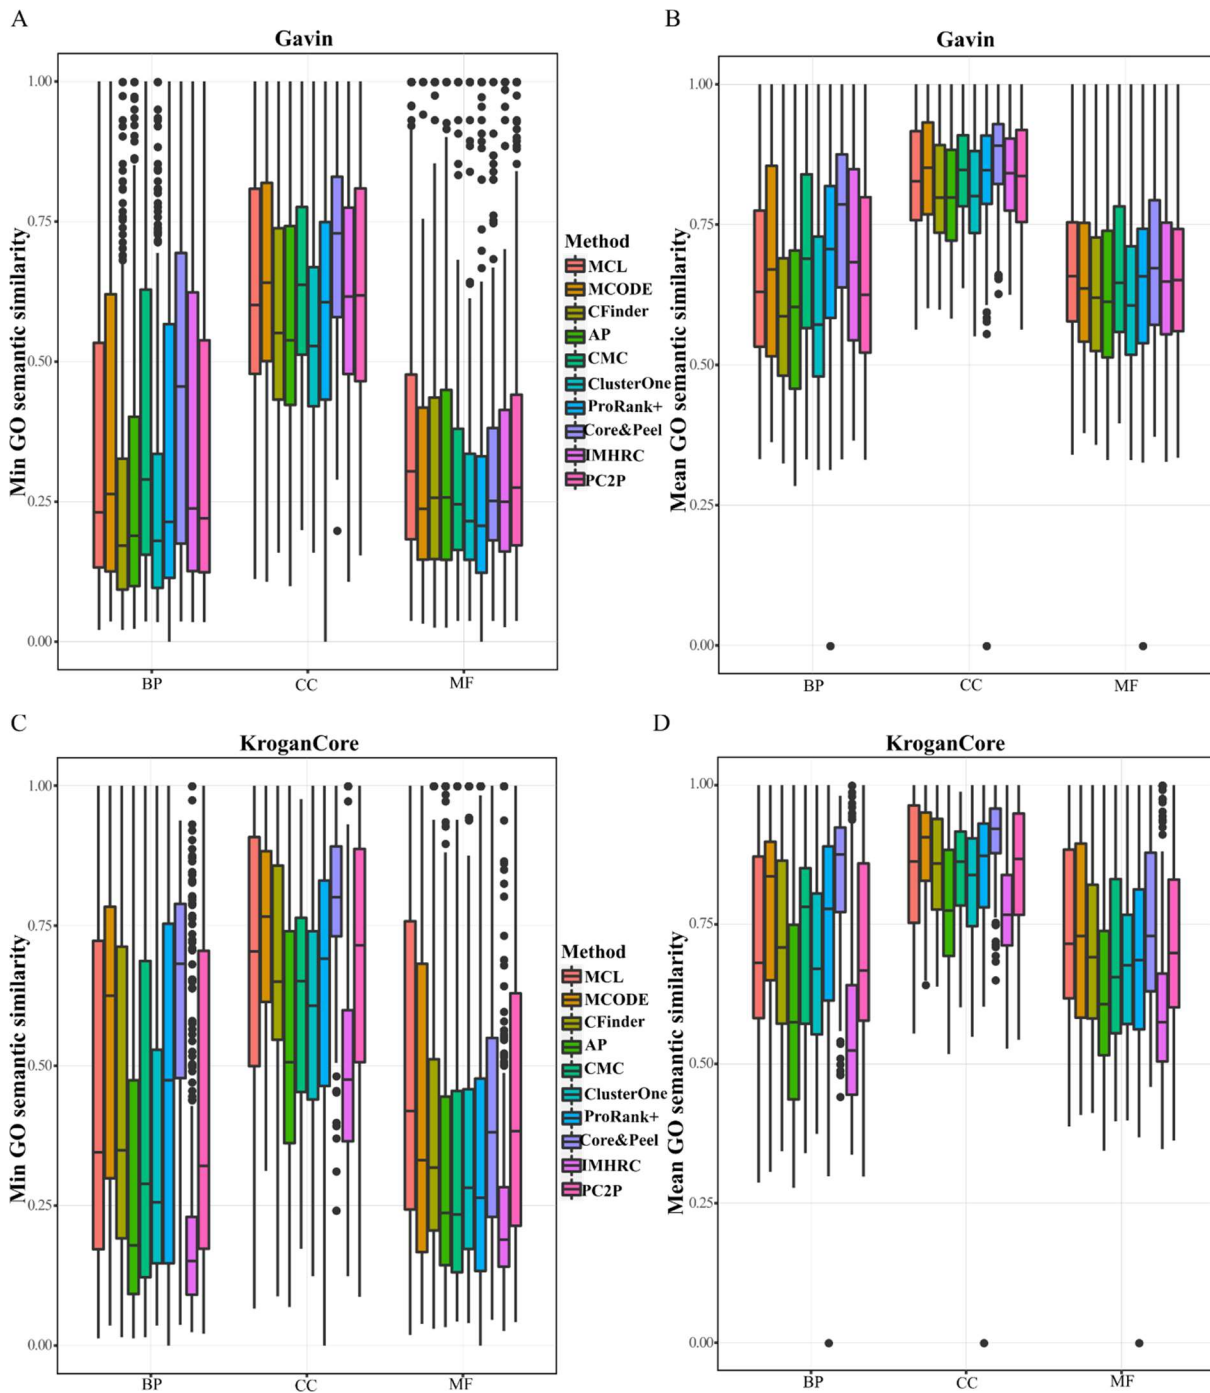

E

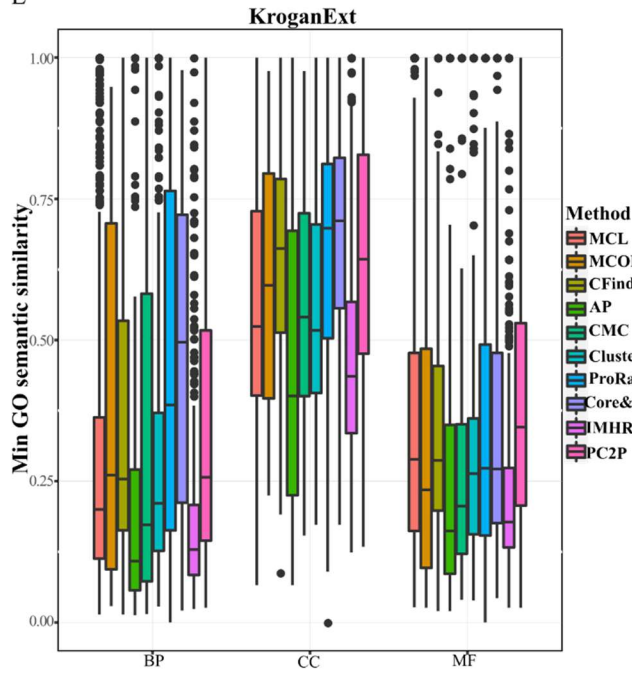

F

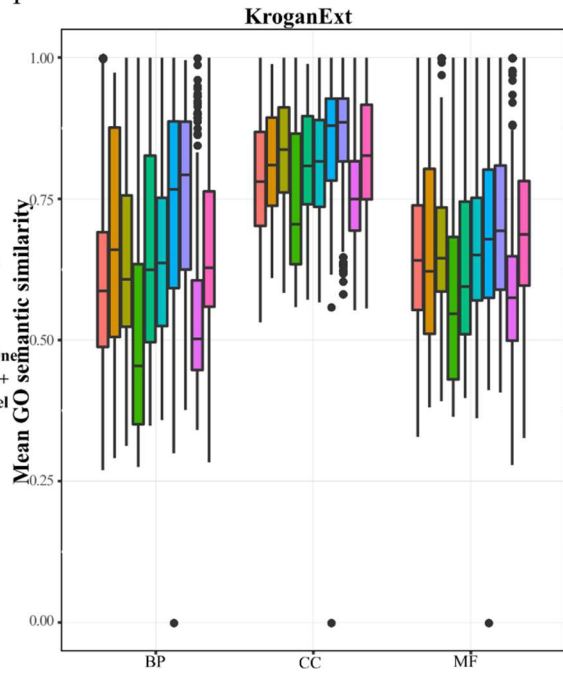

G

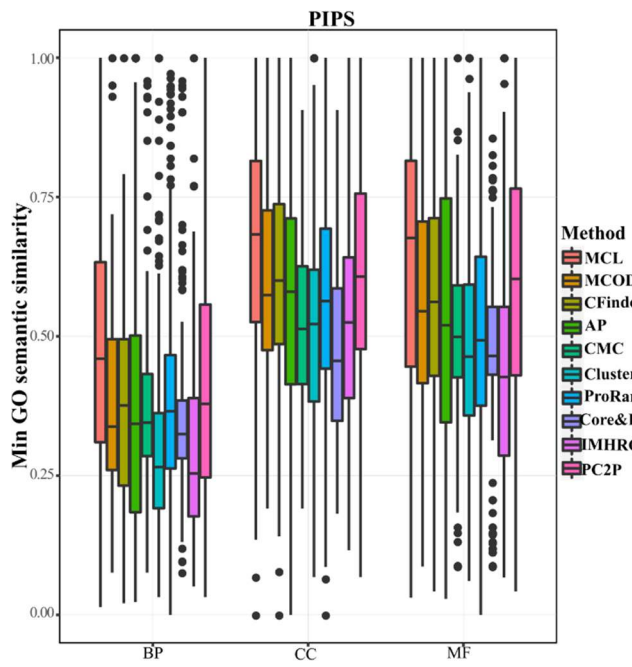

H

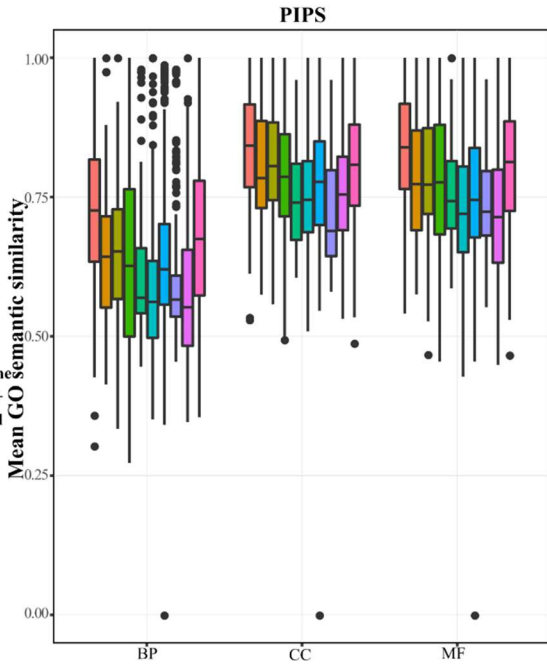

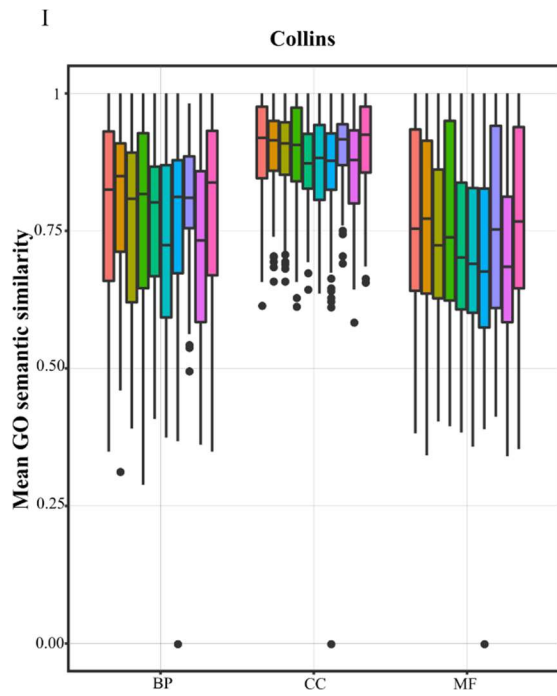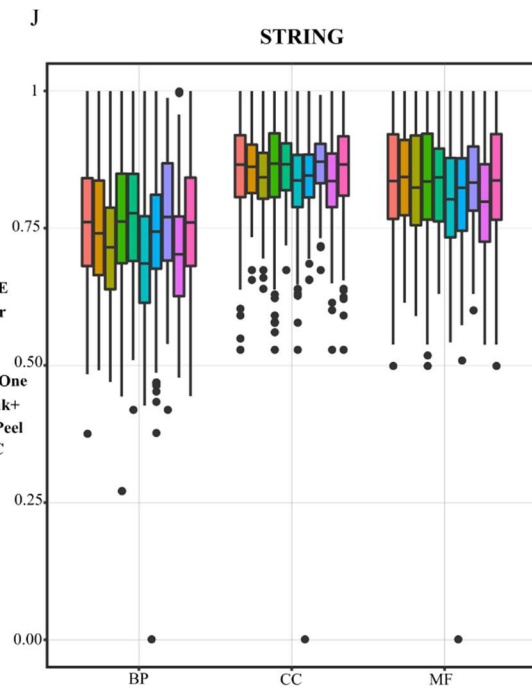

**Supplementary Figure 2. Comparative analysis of approaches for prediction of protein complexes in yeast.** The comparative analyses is conducted with respect to a composite score combining five performance measures, maximum matching ratio (MMR), fraction match (FMR), separation (SEP), accuracy (ACC), and F-measure. Eight approaches, ordered by the year of publication, are compared on four PPI networks in yeast with respect to SGD gold standard. PC2P outperforms all approaches on three of the networks.

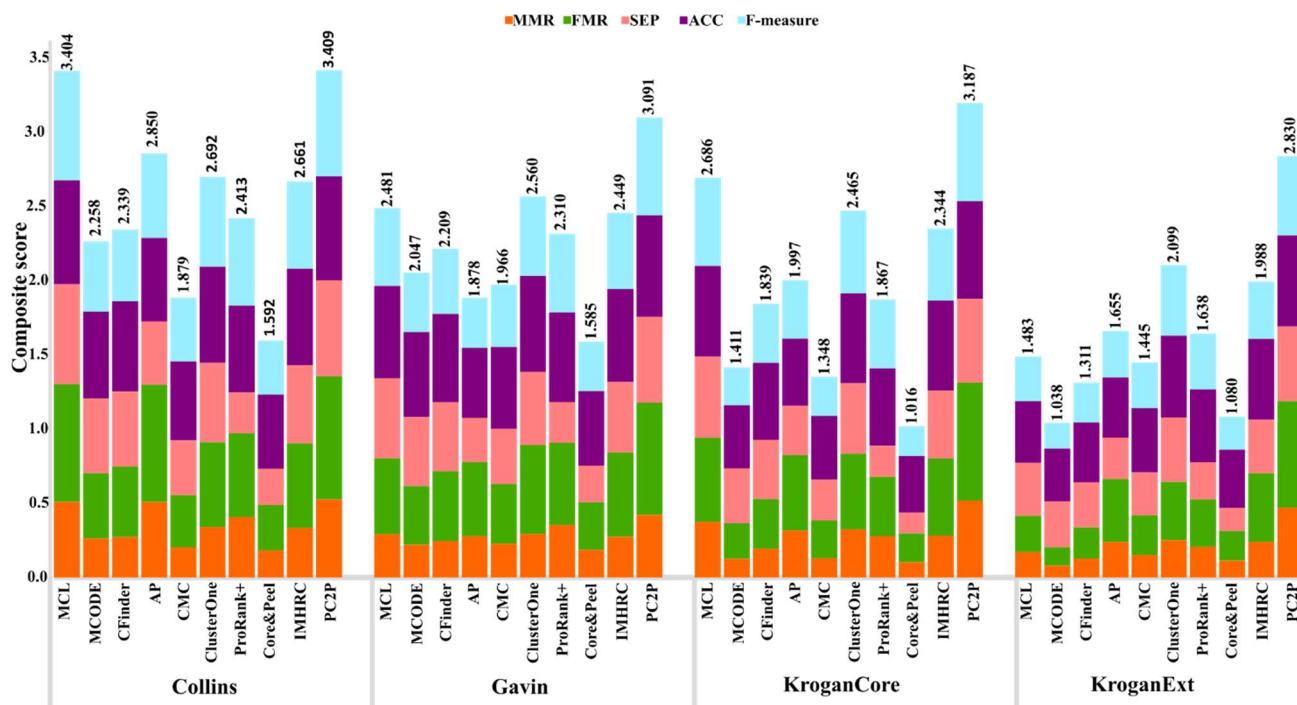



**Supplementary Figure 3. Summation of MMR and F-measure+ of approaches for prediction of protein complexes.** The sum of MMR and F-measure+ is conducted over the range of from 0 to 1. Ten approaches, ordered by the year of publication, are compared on (A-B) Collins, (C-D) KroganCore, (E-F) KroganExt, and (G-H) Gavin and PIPS in yeast and human respectively. PCP2 outperforms all approaches except in Collins.

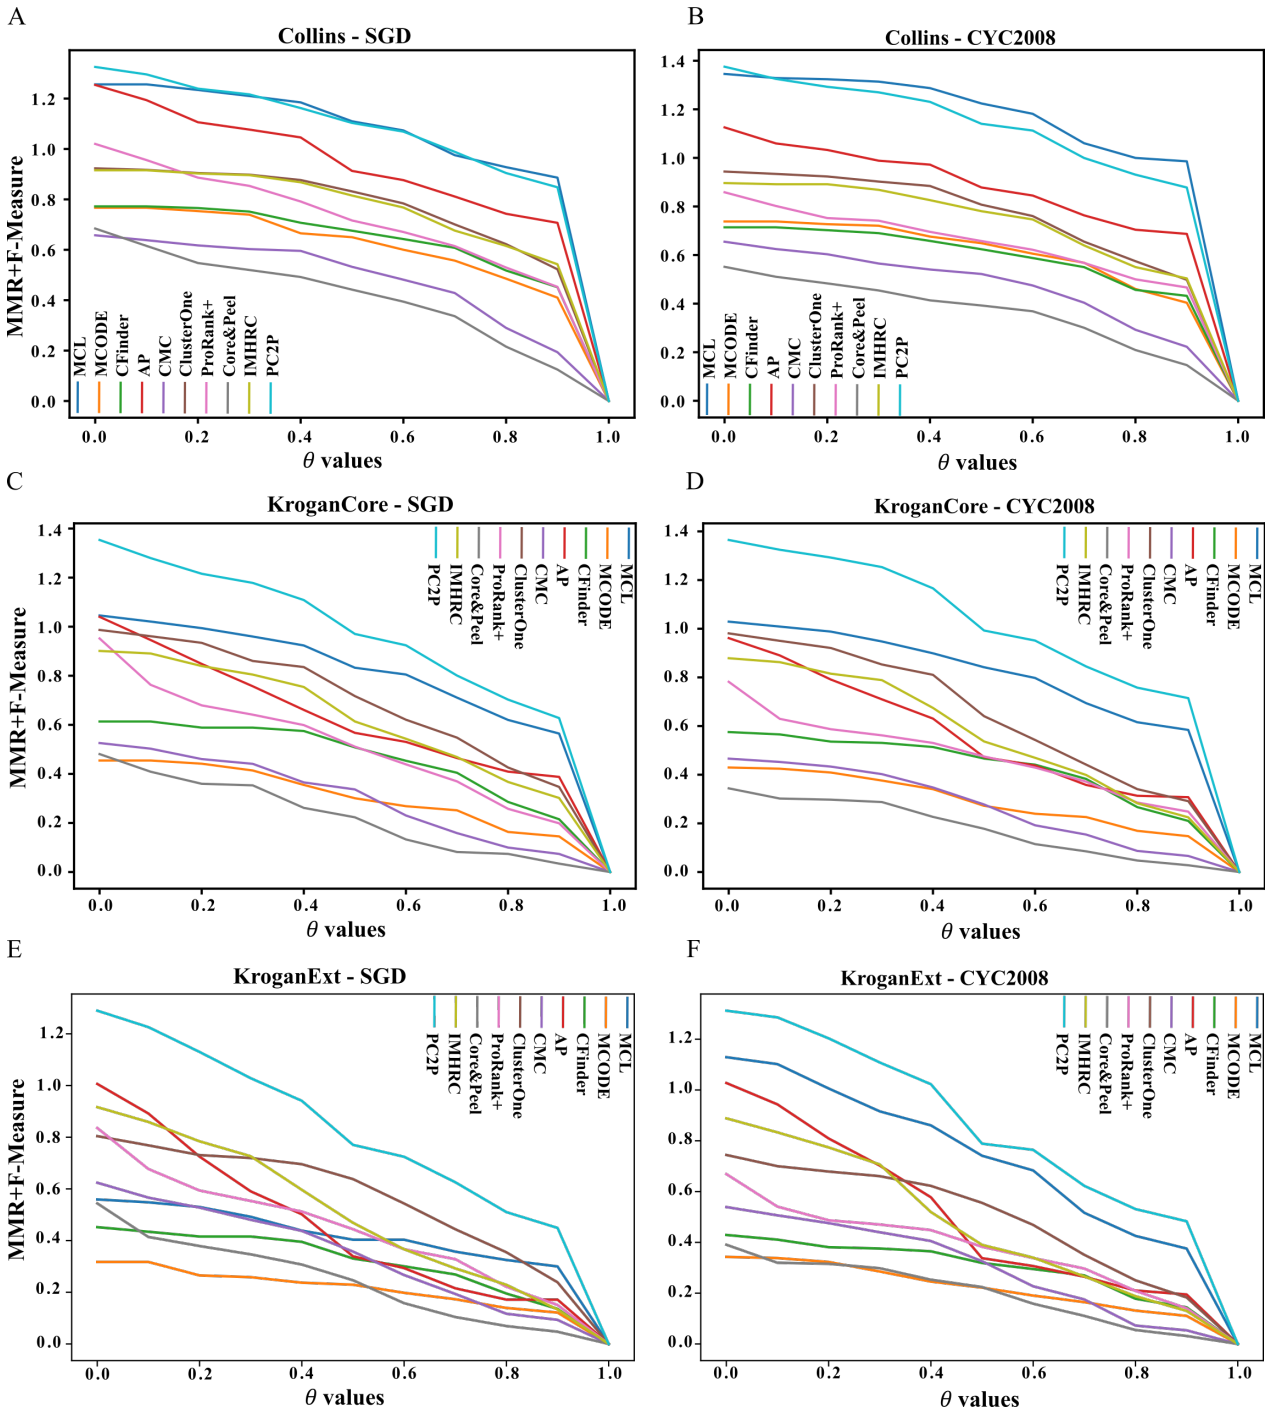

**G**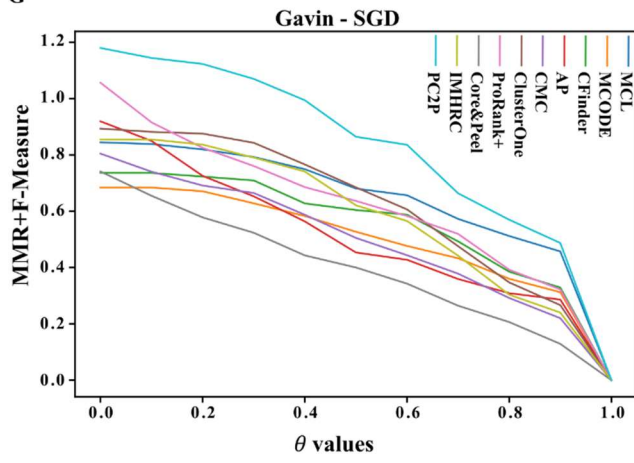**H**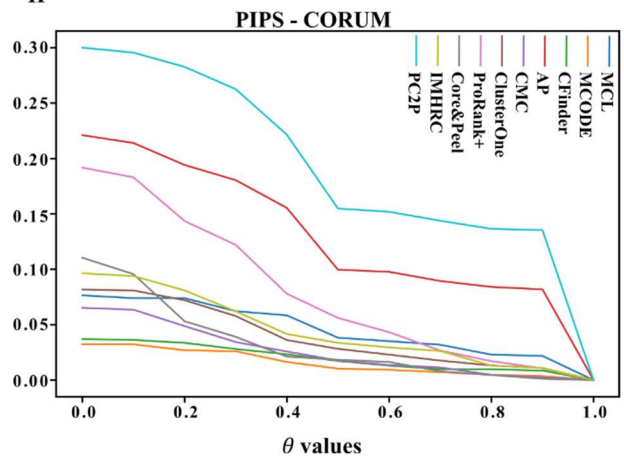

**Supplementary Figure 4. Distribution of clusters size.** The distribution of clusters size from ten approaches are compared on (A) Collins, (B) Gavin, (C) KroganCore, (D) KroganExt, (E) PIPS, and (F) STRING PPI networks. Distribution of cluster size of PC2P does not differ with respect to the compared approaches: For all algorithms, except ClusterOne, Core&Peel, and IMHRC, the cluster size distributions are monotonically decreasing by increasing the size of clusters.

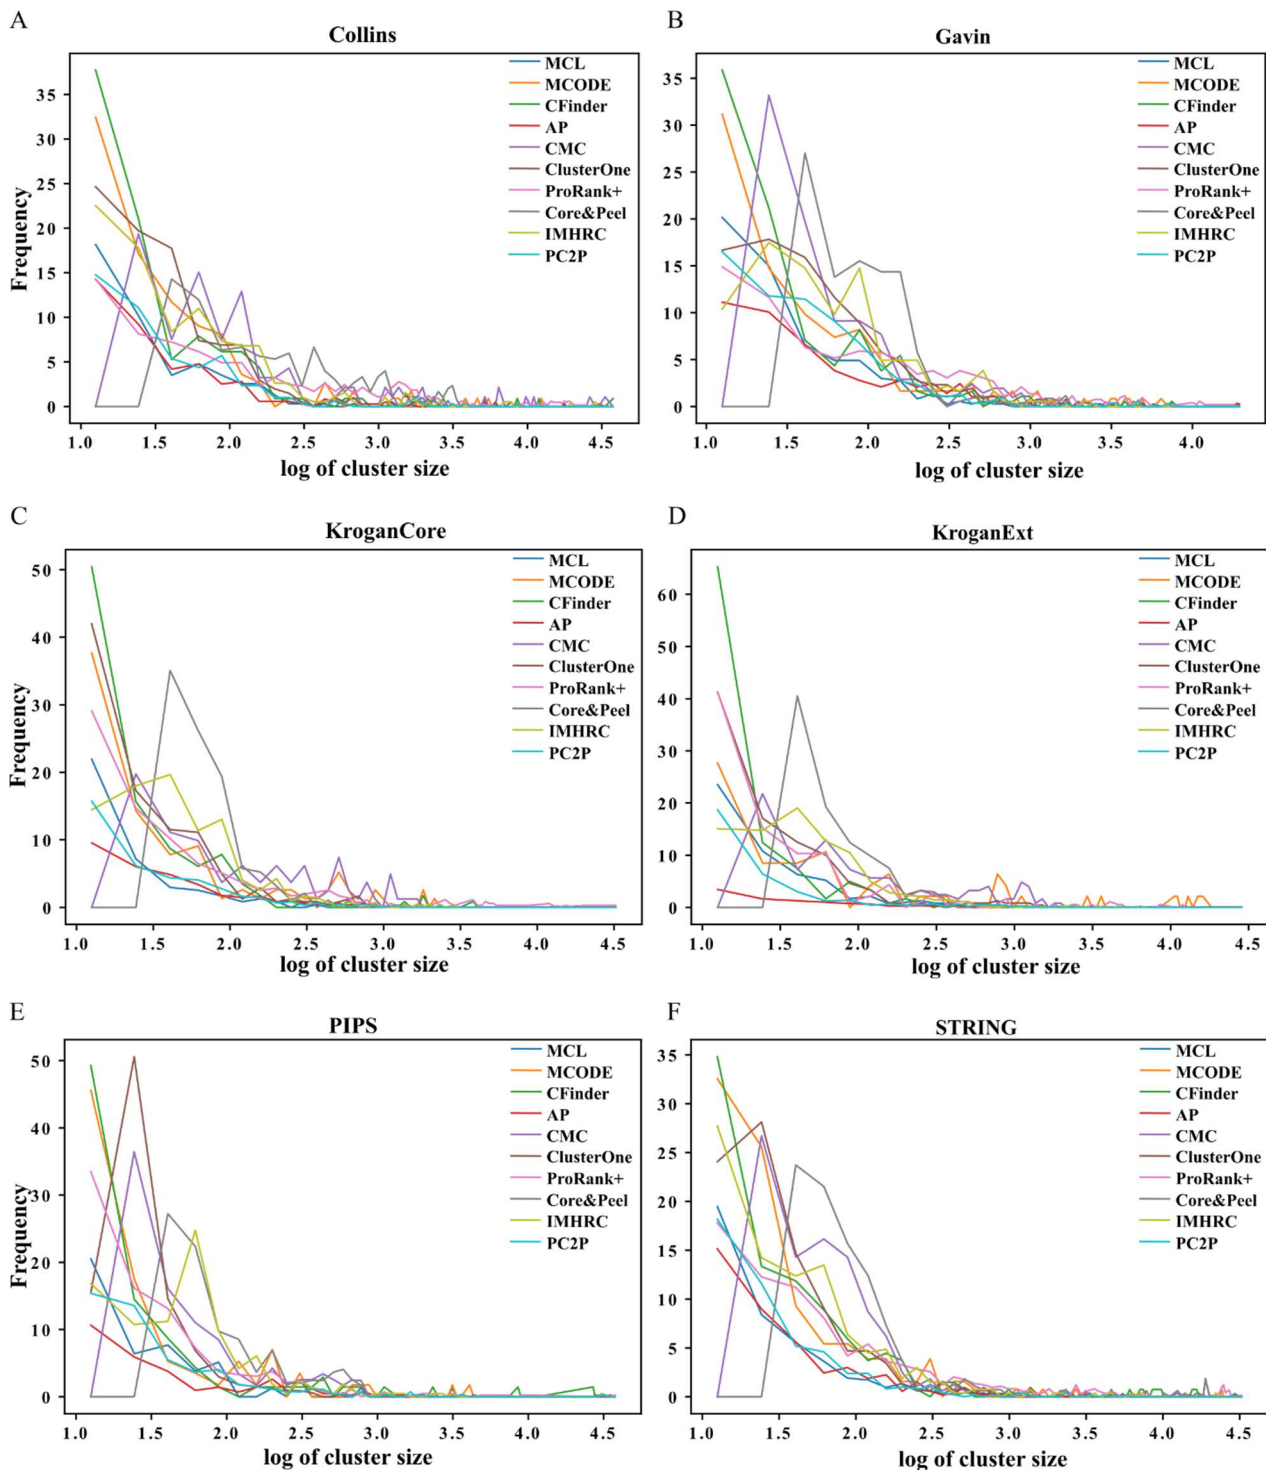

Supplement: btaa1089_supplementary_data.pdf [file btaa1089_supplementary_data.pdf]
